# Supplementary material for: Neutralization of Lipocalin-2 Diminishes Stroke-Reperfusion Injury
Source: MDPI journal article supplement (doi:10.3390/ijms21176253), 2020-08-29
Supplement: s1 [file s1]

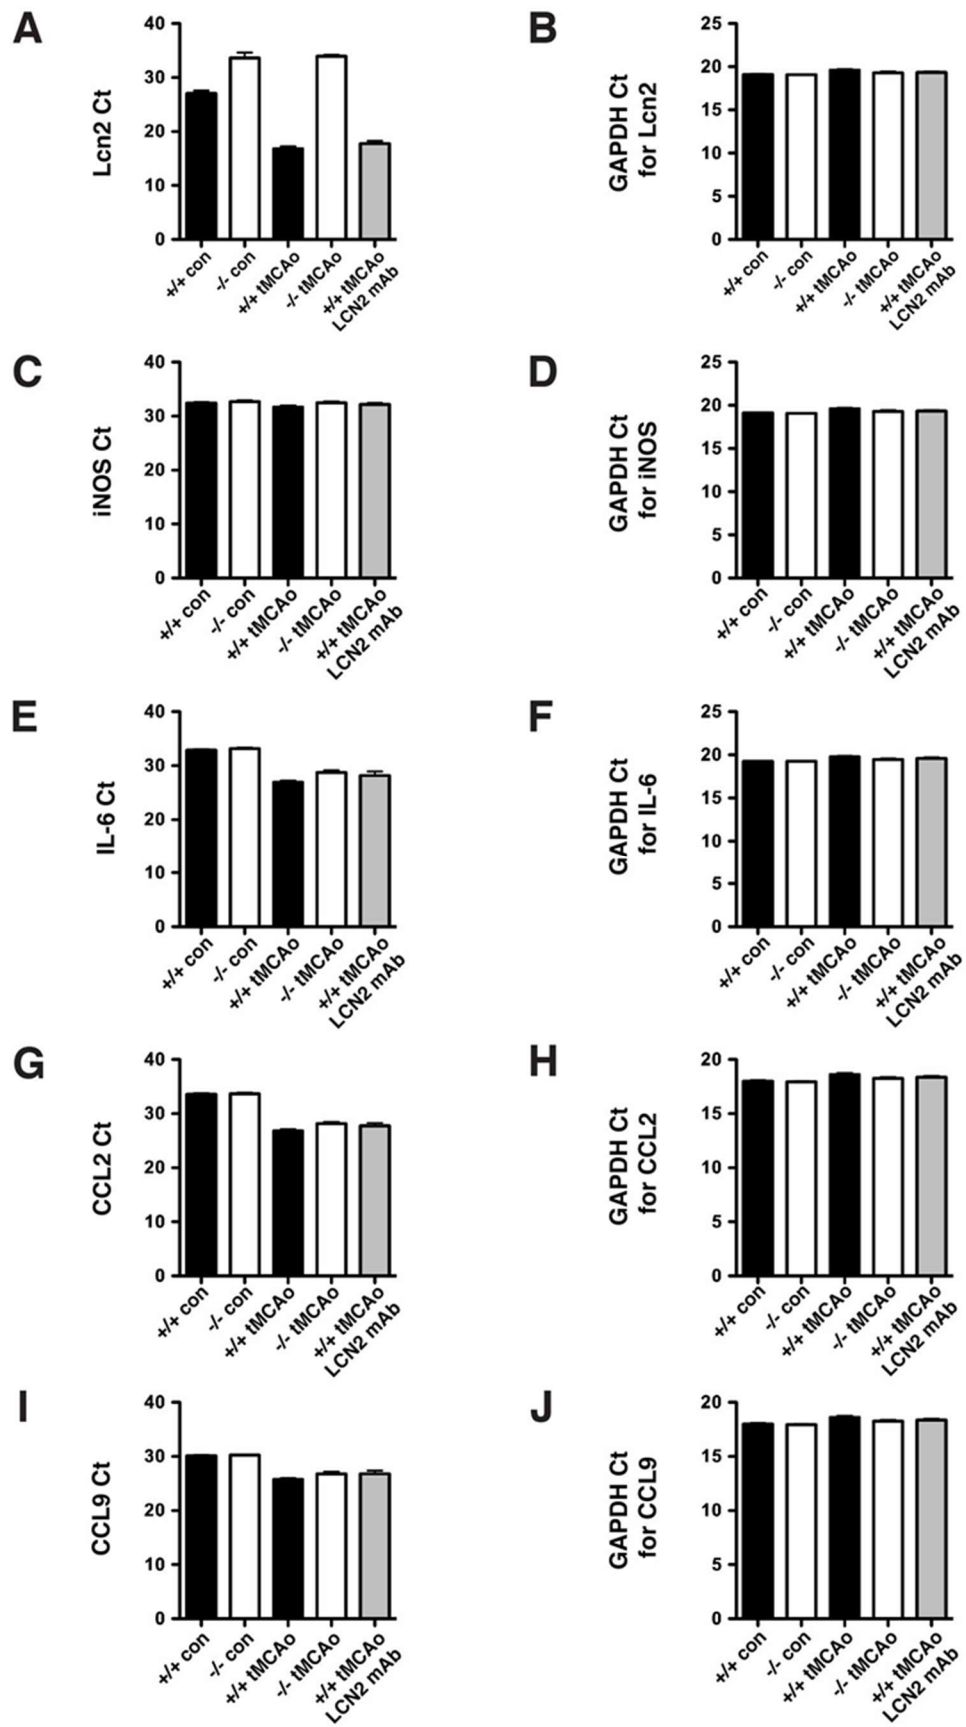

**Figure S1.** Ct values of qPCR results for LCN2 (A), iNOS (C), IL-6 (E), CCL2 (G), CCL9 (I) and their associated GAPDH's (B,D,F,H,J).
